# Supplementary material
Source: PubMed Central journal article supplement (PMC2000387)
Supplement: pnas_0705367104_1.pdf [file pnas_0705367104_1.pdf]

A)

B1 TYK**L**ILNGK TLKGETTTEA VDAATAEKVF KQYANDNGVD GEWTYDDATK TFTVTE  
C2 TYK**L**VINGK TLKGETTTEA VDAATAEKVF KQYANDNGVD GEWTYDDATK TFTVTE  
NuG2 TYK**L**VIV**L**N **G**TT**F**TYTTEA VDAATAEKVF KQYANDNGVD GEWTYDDATK TFTVTE

B)

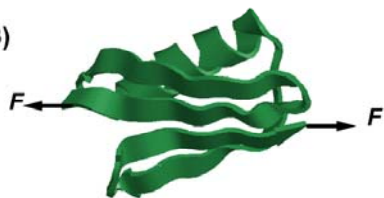

B1 domain (3GB1)

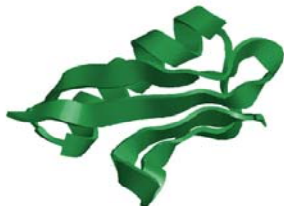

C2 domain (2IGG)

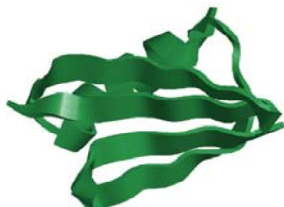

NuG2 (1MIO)

C)

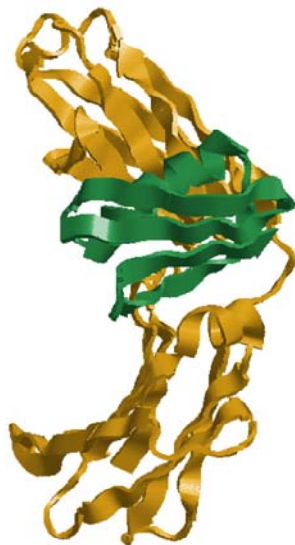

C2 in complex with hFc  
(1FCC)
