# Supplementary material
Source: PubMed Central journal article supplement (PMC2000387)

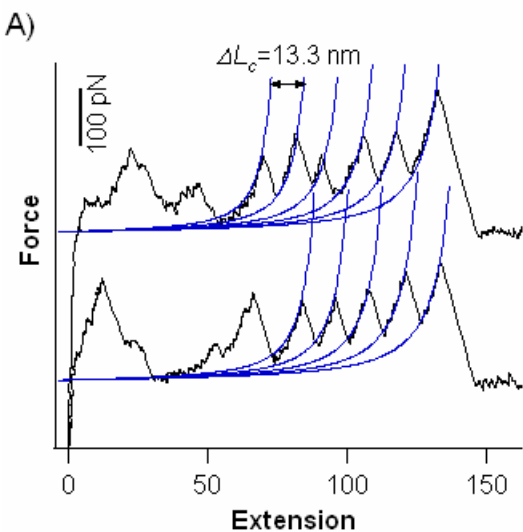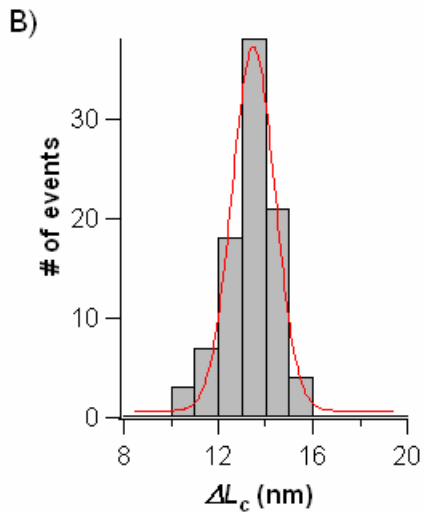

Supplement: pnas_0705367104_2.pdf [file pnas_0705367104_2.pdf]

Frequency

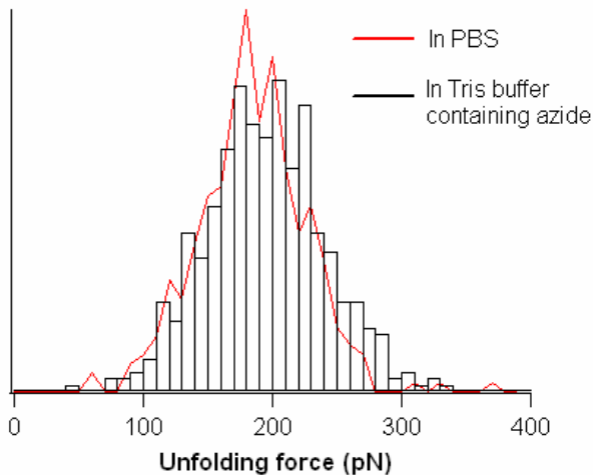

Supplement: pnas_0705367104_3.pdf [file pnas_0705367104_3.pdf]
